# Supplementary material for: Highly efficient nano-sized TS-1 with micro-/mesoporosity from desilication and recrystallization for the epoxidation of biodiesel with H2O2
Source: Royal Society of Chemistry journal article supplement (doi:10.1039/c5gc00406c), 2015-01-01
Supplement: c5gc00406c1.pdf [file c5gc00406c1.pdf]

## Electronic Supplementary Material (ESI)

### Highly Efficient Nano-sized TS-1 with Micro-/Mesoporosity from Desilication and Recrystallization for the Epoxidation of Biodiesel with $\text{H}_2\text{O}_2$

N. Wilde, M. Pelz, S.G. Gebhardt, and R. Gläser\*

*Institute of Chemical Technology, Universität Leipzig, Linnéstr. 03, 04103 Leipzig, Germany*

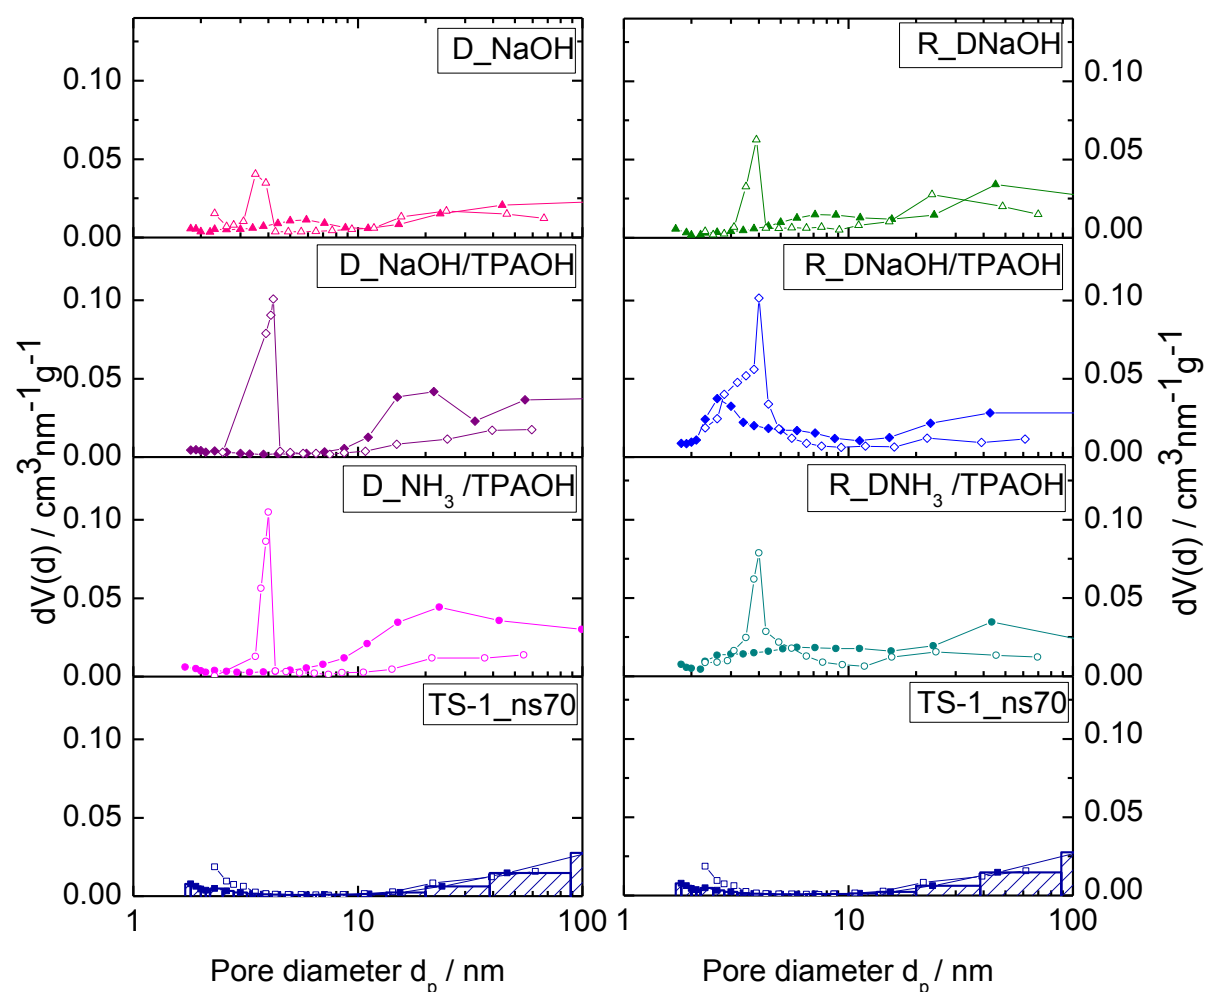

**Figure S1:** BJH pore size distributions of desilicated (D-series) (left part) and recrystallized TS-1 (R\_D-series) (right part) calculated from the desorption branch (open symbols) as well as the adsorption branch (closed symbols) of the nitrogen sorption isotherms. The pore size distribution of TS-1\_ns70 is given for comparison.

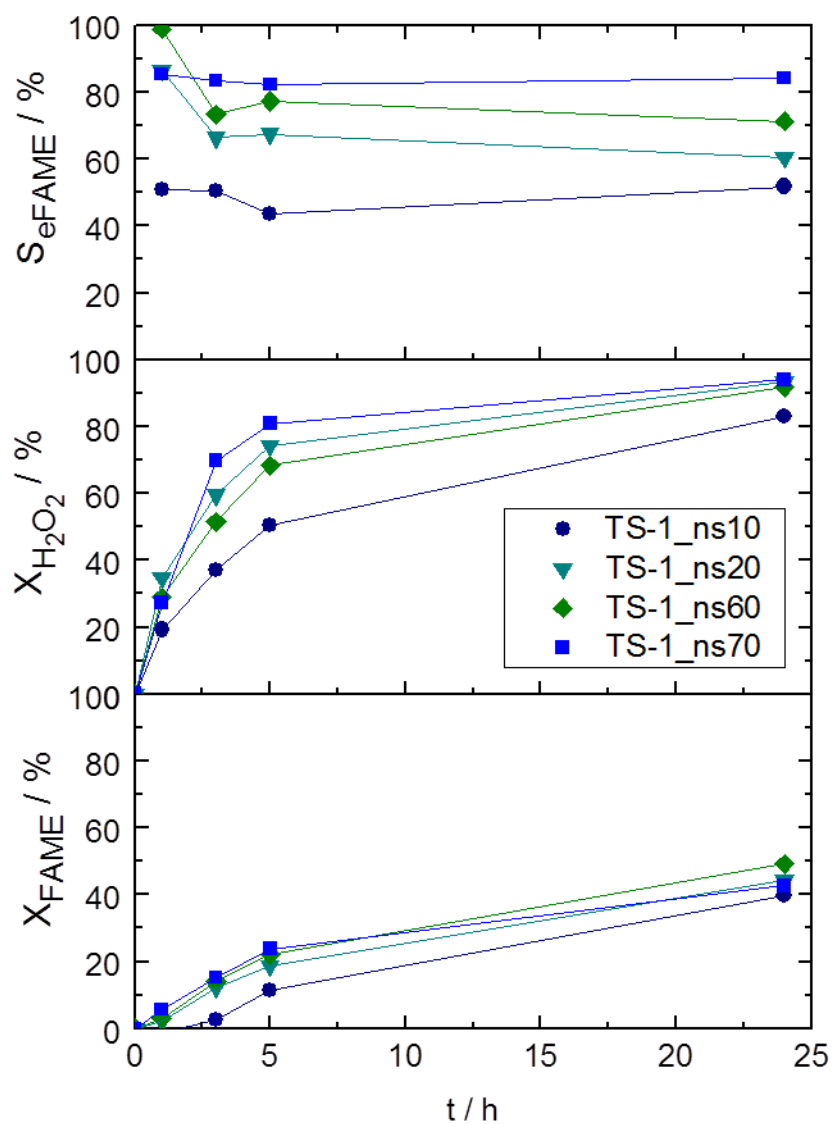

**Figure S2:** Conversion of biodiesel ( $X_{FAME}$ ), epoxide selectivity ( $S_{eFAME}$ ) and conversion of hydrogen peroxide ( $X_{H_2O_2}$ ) as a function of reaction time in the epoxidation of Biodiesel over nano-sized TS-1\_ns obtained after different times of microwave irradiation during synthesis ( $V_{acetonitrile} = 10 \text{ cm}^3$ ,  $c_{FAME} = 0,03 \text{ mol L}^{-1}$ ,  $(n_{H_2O_2}/n_{FAME}) = 5 \text{ mol mol}^{-1}$ ,  $m_{cat.} = 150 \text{ mg}$ ,  $T = 323 \text{ K}$ ).

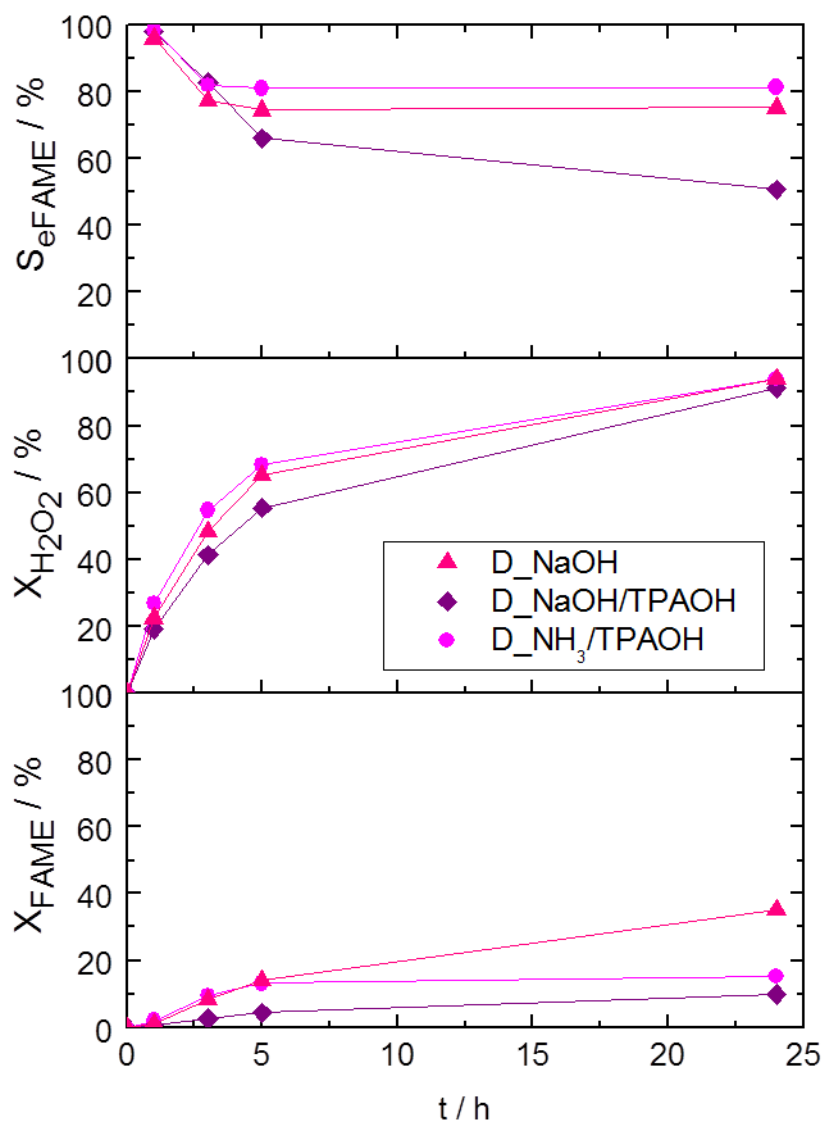

**Figure S3:** Conversion of biodiesel ( $X_{FAME}$ ), epoxide selectivity ( $S_{eFAME}$ ) and conversion of hydrogen peroxide ( $X_{H_2O_2}$ ) as a function of reaction time in the epoxidation of biodiesel over desilicated nano-sized TS-1 (D-series) ( $V_{acetonitrile} = 10 \text{ cm}^3$ ,  $c_{FAME} = 0,03 \text{ mol L}^{-1}$ ,  $(n_{H_2O_2}/n_{FAME}) = 5 \text{ mol mol}^{-1}$ ,  $m_{cat.} = 150 \text{ mg}$ ,  $T = 323 \text{ K}$ ).

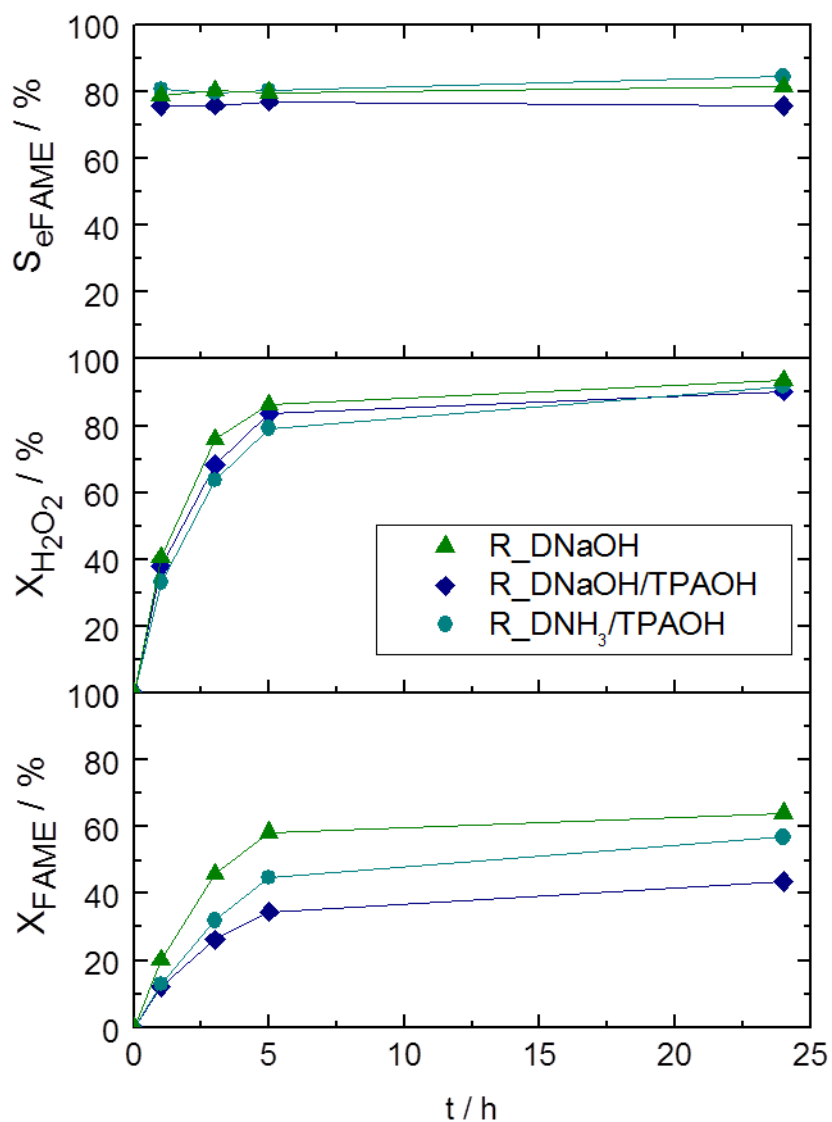

**Figure S4:** Conversion of biodiesel ( $X_{FAME}$ ), epoxide selectivity ( $S_{eFAME}$ ) and conversion of hydrogen peroxide ( $X_{H_2O_2}$ ) as a function of reaction time in the epoxidation of biodiesel over recrystallized nano-sized TS-1 (R\_D-series) ( $V_{acetonitrile} = 10 \text{ cm}^3$ ,  $c_{FAME} = 0,03 \text{ mol L}^{-1}$ ,  $(n_{H_2O_2}/n_{FAME}) = 5 \text{ mol mol}^{-1}$ ,  $m_{cat.} = 150 \text{ mg}$ ,  $T = 323 \text{ K}$ ).
